# Supplementary material for: A conserved Mcm4 motif is required for Mcm2-7 double-hexamer formation and origin DNA unwinding
Source: eLife journal article supplement (doi:10.7554/elife.45538), 2019-08-06
Supplement: supp [file elife-45538-supp-v1.zip]

Archive with 14 entries (14 files):
- elife_poa_e45538_Figure_4_figure_supplement_2.ai
- elife_poa_e45538_Figure_5_figure_supplement_1.ai
- elife_poa_e45538_Figure_1_figure_supplement_1.ai
- elife_poa_e45538_Figure_3_source_data_file_1.xlsx
- elife_poa_e45538_Supplementary_file_1.docx
- elife_poa_e45538_Figure_7_figure_supplement_1.ai
- elife_poa_e45538_Figure_6_figure_supplement_1.ai
- elife_poa_e45538_Figure_1_figure_supplement_2.ai
- elife_poa_e45538_Transparent_Reporting_File.pdf
- elife_poa_e45538_Figure_4_source_data_file_1.xlsx
- elife_poa_e45538_Figure_7_source_data_file_1.xlsx
- elife_poa_e45538_Figure_3_figure_supplement_1.pdf
- elife_poa_e45538_Figure_4_figure_supplement_1.pdf
- elife_poa_e45538_Video_1.mp4
