# Supplementary material for: A conserved Mcm4 motif is required for Mcm2-7 double-hexamer formation and origin DNA unwinding
Source: eLife journal article supplement (doi:10.7554/elife.45538), 2019-08-06
Supplement: supp [file elife-45538-supp-v1.zip › elife_poa_e45538_Figure_3_source_data_file_1.xlsx]

## Sheet: Figure 3
Loading assay: Band intensity from Mcm6 band						Band intensity in % of WT
Band #	Mcm4 Alelle	replicate #1	replicate #2	replicate #3		#1	#2	#3	Average	SD
1	WT	15974.3	18520.5	13633.3		1	1	1	1	0
8	7A	8548.82	9891.43	7579.79		0.535162	0.534081	0.555977	0.54174	0.0123416
9	delta175-181	8126.63	9136.2	6350.31		0.508732	0.493303	0.465795	0.489277	0.02175
replicate #1
Band #	Intensity
1	15974.3
2	15288.1
3	8484.51
4	9319.79
5	9553.19
6	9271.31
7	15704.3
8	8548.82
9	8126.63
replicate #2
Band #	Intensity
1	18520.5
2	17819.1
3	9957.81
4	9348.34
5	9747.5
6	8641.76
7	18202
8	9891.43
9	9136.2
replicate #3
Band #	Intensity
1	13633.3
2	12134.9
3	6954.14
4	7029.2
5	7049.25
6	6881.22
7	12580.5
8	7579.79
9	6350.31
