# Supplementary material for: A conserved Mcm4 motif is required for Mcm2-7 double-hexamer formation and origin DNA unwinding
Source: eLife journal article supplement (doi:10.7554/elife.45538), 2019-08-06
Supplement: supp [file elife-45538-supp-v1.zip › elife_poa_e45538_Figure_4_source_data_file_1.xlsx]

## Sheet: Figure 4
Loading assay: Band intensity from Mcm6 band						Band intensity in % of WT
Band #	Mcm4 Alelle	replicate #1	replicate #2	replicate #3		#1	#2	#3	Average	SD
1	WT	15974.3	18520.5	13633.3		100	100	100	100	0
2	175A	15288.1	17819.1	12134.9		95.7048	96.2129	89.0096	93.6424	4.02019
3	178A	8484.51	9957.81	6954.14		53.1136	53.7665	51.0086	52.6296	1.44127
4	181FA	9319.79	9348.34	7029.2		58.3425	50.4757	51.5592	53.4591	4.26368
5	182A	9553.19	9747.5	7049.25		59.8036	52.631	51.7062	54.7136	4.43225
6	185A	9271.31	8641.76	6881.22		58.039	46.6606	50.4737	51.7245	5.7914
7	188A	15704.3	18202	12580.5		98.3098	98.2805	92.2779	96.2894	3.47411
replicate #1
Band #	Intensity
1	15974.3
2	15288.1
3	8484.51
4	9319.79
5	9553.19
6	9271.31
7	15704.3
8	8548.82
9	8126.63
replicate #2
Band #	Intensity
1	18520.5
2	17819.1
3	9957.81
4	9348.34
5	9747.5
6	8641.76
7	18202
8	9891.43
9	9136.2
replicate #3
Band #	Intensity
1	13633.3
2	12134.9
3	6954.14
4	7029.2
5	7049.25
6	6881.22
7	12580.5
8	7579.79
9	6350.31
