# Supplementary material for: A conserved Mcm4 motif is required for Mcm2-7 double-hexamer formation and origin DNA unwinding
Source: eLife journal article supplement (doi:10.7554/elife.45538), 2019-08-06
Supplement: supp [file elife-45538-supp-v1.zip › elife_poa_e45538_Figure_7_source_data_file_1.xlsx]

## Sheet: Figure 7
CMG formation assay immunoblot intensities							Intensity -DDK subtracted from intensity +DDK										Average				Standard Deviation
Immunoblot	Mcm4 Alelle	DDK phosphorylation	Intensity Replicate 1	Intensity Replicate 2	Intensity Replicate 3		Replicate 1	Replicate 2	Replicate 3		% of WT Rep 1	% of WT Rep 2	% of WT Rep 3	AVG	SD			Mcm4 allele				Mcm4 allele
Mcm2-7	WT	No	122.623	54.881	70.673						0.806316	0.824373	1.05531	0.895333	0.138837			WT	178A			WT	178A
Mcm2-7	WT	Yes	152.078	66.573	66.969						1	1	1	1	0		Mcm2-7	1	0.502944		Mcm2-7	0	0.0341089
Mcm2-7	178A	No	84.603	34.631	47.732						0.556313	0.520196	0.712748	0.596419	0.102349		Cdc45	1	0.543291		Cdc45	0	0.137916
Mcm2-7	178A	Yes	82.19	32.928	31.728						0.540446	0.494615	0.473771	0.502944	0.0341089		GINS	1	0.502115		GINS	0	0.162254
Cdc45	WT	No	4.986	4.29	13.375
Cdc45	WT	Yes	128.164	93.821	120.785		123.178	89.531	107.41		1	1	1	1	0
Cdc45	178A	No	16.051	15.045	23.113
Cdc45	178A	Yes	93.539	49.443	89.342		77.488	34.398	66.229		0.629073	0.384202	0.616597	0.543291	0.137916
GINS	WT	No	9.848	3.19	0.344
GINS	WT	Yes	119.572	90.768	106.167		109.724	87.578	105.823		1	1	1	1	0
GINS	178A	No	2.446	13.293	1.3
GINS	178A	Yes	76.12	55.933	38.128		73.674	42.64	36.828		0.671448	0.48688	0.348015	0.502115	0.162254
Replicate 1
Mcm2-7 immunoblot
Lane	Mcm4 Alelle	DDK phosphorylation	Intensity
1	WT	No	54.881
2	WT	Yes	66.573
3	178A	No	34.631
4	178A	Yes	32.928
Cdc45 immunoblot
Lane	Mcm4 Alelle	DDK phosphorylation	Intensity
1	WT	No	4.29
2	WT	Yes	93.821
3	178A	No	15.045
4	178A	Yes	49.443
GINS immunoblot
Lane	Mcm4 Alelle	DDK phosphorylation	Intensity
1	WT	No	3.19
2	WT	Yes	90.768
3	178A	No	13.293
4	178A	Yes	55.933
Replicate 2
Mcm2-7 immunoblot
Lane	Mcm4 Alelle	DDK phosphorylation	Intensity
4	WT	No	122.623
1	WT	Yes	152.078
5	178A	No	84.603
2	178A	Yes	82.19
*Lanes 3 was not quantified for the figure
Cdc45 immunoblot
Lane	Mcm4 Alelle	DDK phosphorylation	Intensity
4	WT	No	4.986
1	WT	Yes	128.164
5	178A	No	16.051
2	178A	Yes	93.539
*Lanes 3 was not quantified for the figure
GINS immunoblot
Lane	Mcm4 Alelle	DDK phosphorylation	Intensity
4	WT	No	9.848
1	WT	Yes	119.572
5	178A	No	2.446
2	178A	Yes	76.12
*Lanes 3 was not quantified for the figure
Replicate 3
Mcm2-7 immunoblot
Lane	Mcm4 Alelle	DDK phosphorylation	Intensity
2	WT	No	70.673
1	WT	Yes	66.969
5	178A	No	47.732
4	178A	Yes	31.728
*Lane 3 was not quantified for the figure
Cdc45 immunoblot
Lane	Mcm4 Alelle	DDK phosphorylation	Intensity
2	WT	No	13.375
1	WT	Yes	120.785
5	178A	No	23.113
4	178A	Yes	89.342
*Lane 3 was not quantified for the figure
GINS immunoblot
Lane	Mcm4 Alelle	DDK phosphorylation	Intensity
2	WT	No	0.344
1	WT	Yes	106.167
5	178A	No	1.3
4	178A	Yes	38.128
*Lane 3 was not quantified for the figure
