# Supplementary figures and images for: A conserved Mcm4 motif is required for Mcm2-7 double-hexamer formation and origin DNA unwinding
Source: eLife journal article supplement (doi:10.7554/elife.45538), 2019-08-06

Champasa et al.  
Figure 3-figure supplement 1

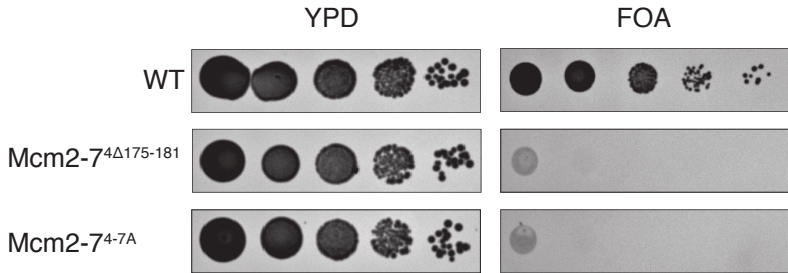

Supplement: supp [file elife-45538-supp-v1.zip]

Figure 4-figure supplement 1

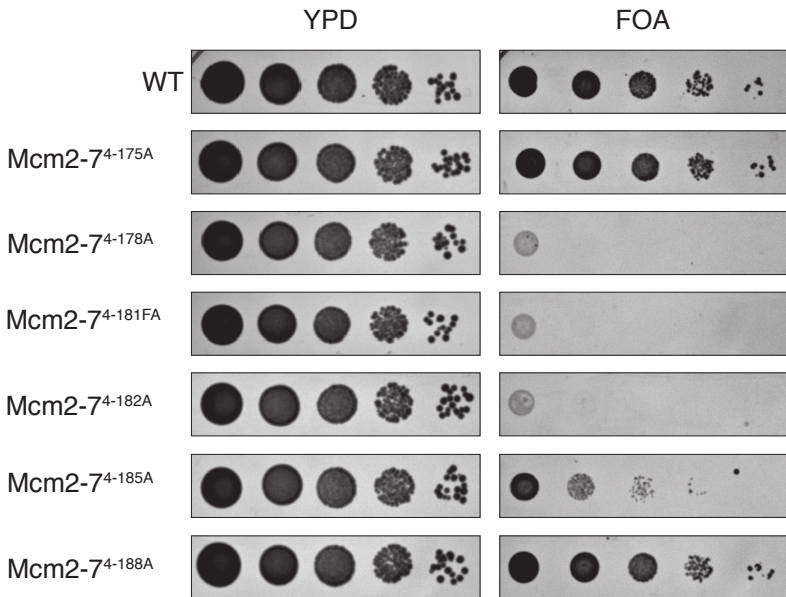

Supplement: supp [file elife-45538-supp-v1.zip › elife_poa_e45538_Figure_4_figure_supplement_1.pdf]
